# Supplementary material for: Tailored Li4Ti5O12 nanofibers with outstanding kinetics for lithium rechargeable batteries
Source: Royal Society of Chemistry journal article supplement (doi:10.1039/c2nr31675g), 2012-01-01
Supplement: c2nr31675g.pdf [file c2nr31675g.pdf]

# Supplementary Information

## Tailored $\text{Li}_4\text{Ti}_5\text{O}_{12}$ Nanofibers with Outstanding Kinetics for Lithium Rechargeable Batteries

Mi Ru Jo,<sup>a</sup> Yeon-Sik Jung <sup>\*b</sup> and Yong mook Kang <sup>\*a</sup>

<sup>a</sup> Department of Chemistry, Dongguk University-Seoul, 100715 Seoul, Republic of Korea.

<sup>b</sup> Department of Materials Science & Engineering, Korea Advanced Institute of Science & Technology (KAIST),  
291 Daehak-ro, Yuseong-gu, Daejeon 305-701, Republic of Korea.

\* Corresponding authors: [dake1234@dongguk.edu](mailto:dake1234@dongguk.edu) (Y.-M.K), [ysjung@kaist.ac.kr](mailto:ysjung@kaist.ac.kr) (Y.S. Jung)

### Table of contents entry

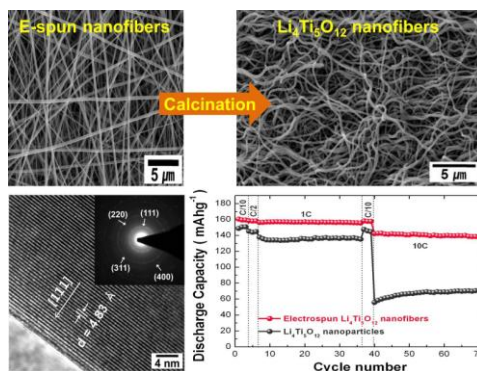

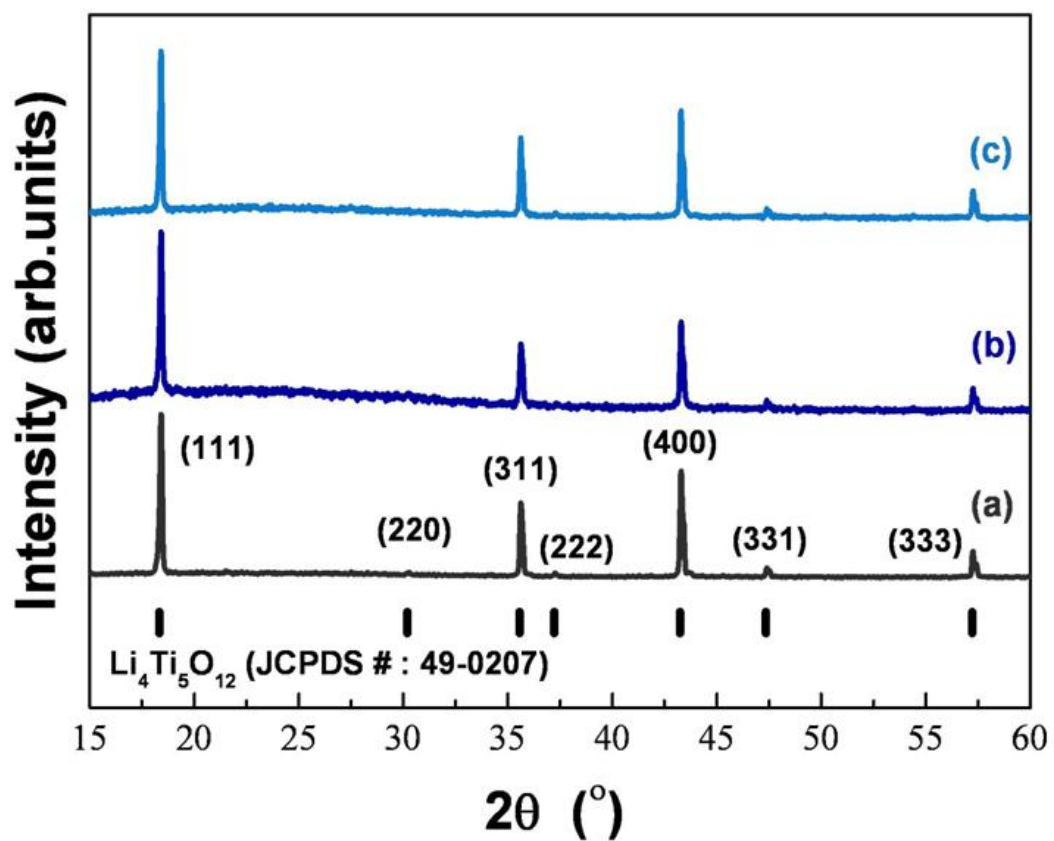

**Fig. S1.** XRD patterns of (a)  $\text{Li}_4\text{Ti}_5\text{O}_{12}$  nanoparticles, polymer/inorganic composites nanofibers calcined at (b) 700°C and (c) 800°C

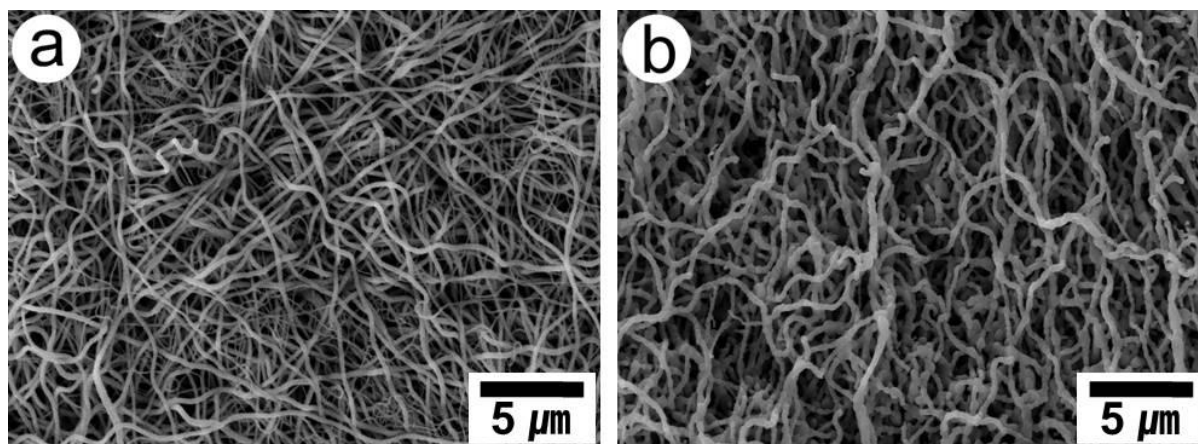

**Fig. S2.** SEM image of electrospun  $\text{Li}_4\text{Ti}_5\text{O}_{12}$  nanofibers after calcination at (a) 700 °C and (b) 800 °C

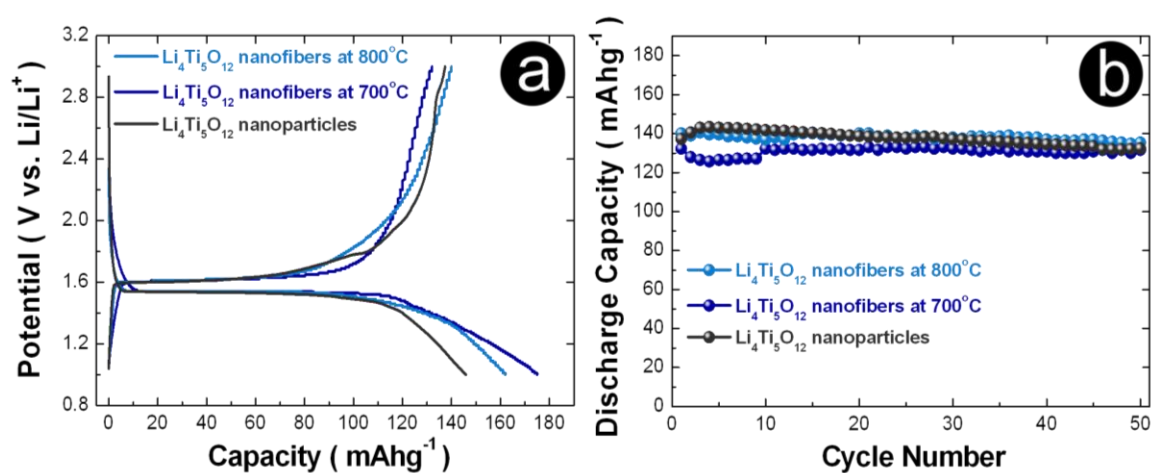

**Fig. S3.** The electrochemical performance of  $\text{Li}_4\text{Ti}_5\text{O}_{12}$  nanofibers and  $\text{Li}_4\text{Ti}_5\text{O}_{12}$  nanoparticles; (a) the initial galvanostatic charge/discharge curves at 0.1C. (b) Cycle performance at 0.1C

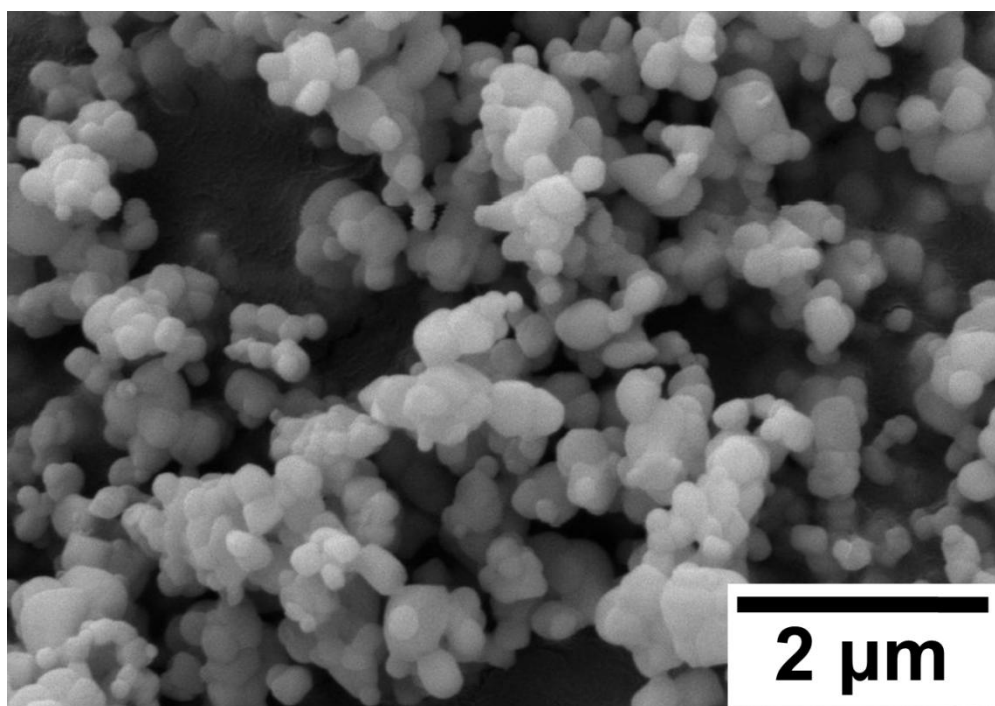

**Fig. S4.** SEM image of as-prepared Li<sub>4</sub>Ti<sub>5</sub>O<sub>12</sub> nanoparticles by solid-state reaction.

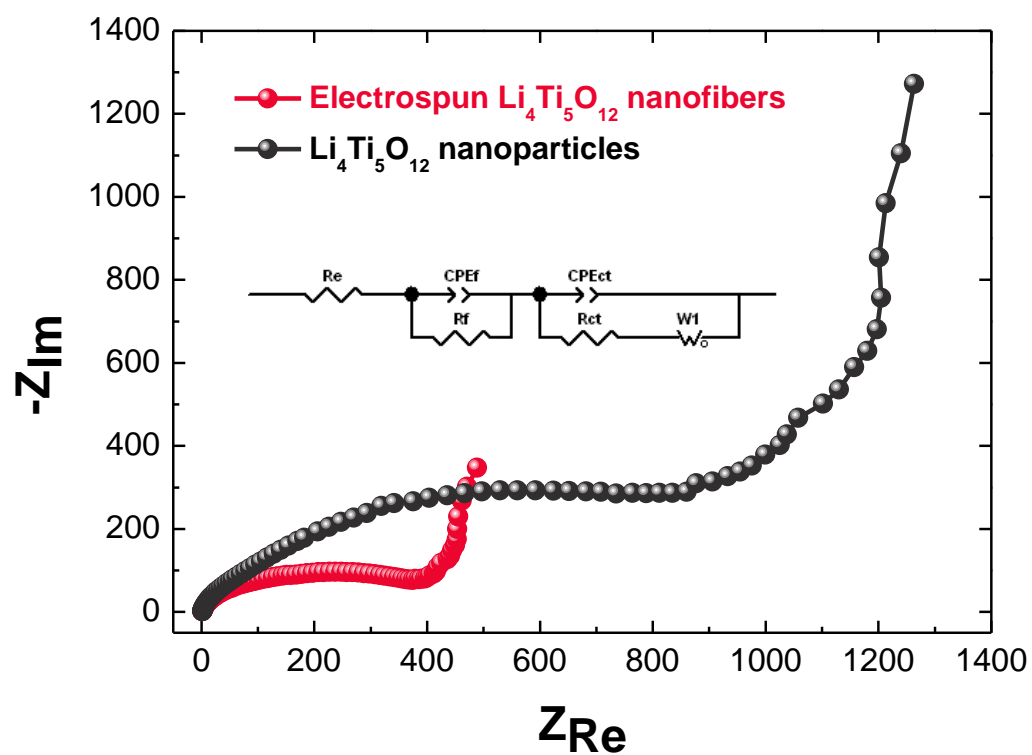

**Fig. S5.** Nyquist plots of electrospun  $\text{Li}_4\text{Ti}_5\text{O}_{12}$  nanofibers and  $\text{Li}_4\text{Ti}_5\text{O}_{12}$  nanoparticles.

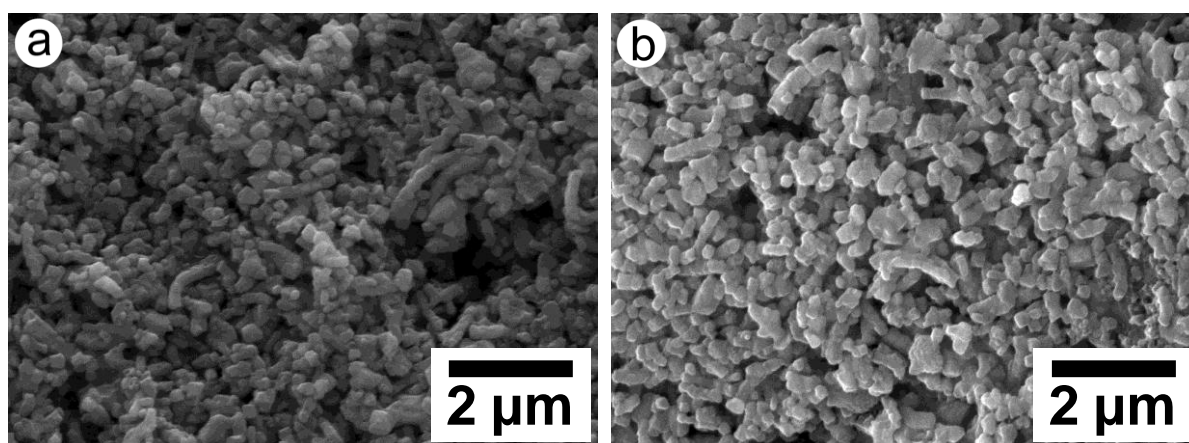

**Fig. S6.** SEM images of (a) as-prepared  $\text{Li}_4\text{Ti}_5\text{O}_{12}$  nanofibers electrode and (b)  $\text{Li}_4\text{Ti}_5\text{O}_{12}$  nanofibers electrode after 50 cycles.

| Sample                                                             | BET<br>( $\text{m}^2 \text{g}^{-1}$ ) | Average pore<br>diameter (nm) | Total pore volume at 0.303<br>of relative pressure ( $\text{cm}^3 \text{g}^{-1}$ ) |
|--------------------------------------------------------------------|---------------------------------------|-------------------------------|------------------------------------------------------------------------------------|
| $\text{Li}_4\text{Ti}_5\text{O}_{12}$<br>nanoparticles             | 2.7458                                | 1.9946                        | 0.0013692                                                                          |
| Electrospun<br>$\text{Li}_4\text{Ti}_5\text{O}_{12}$<br>nanofibers | 9.7128                                | 1.9492                        | 0.0047332                                                                          |

**Table S1.** BET surface area and pore concentration of  $\text{Li}_4\text{Ti}_5\text{O}_{12}$  nanoparticles and nanofibers.
